# Supplementary material for: Expression of a novel NaD1 recombinant antimicrobial peptide enhances antifungal and insecticidal activities
Source: Springer Nature journal article supplement (doi:10.1038/s41598-024-73710-3), 2024-10-05
Supplement: MOESM1 [file 41598_2024_73710_MOESM1_ESM.pdf]

## Expression of a novel NaD1 recombinant antimicrobial peptide enhances antifungal and insecticidal activities

1. Signal peptide- RGS(HIS)6- Xa factor- NaD1- CBDa- CBDb- CBDc- CBDd
2. Signal peptide- RGS(HIS)6- Xa factor- NaD1- linker (EAAAK)2- CBDa- CBDb- CBDc- CBDd
3. Signal peptide- RGS(HIS)6- Xa factor- NaD1- linker (EAAAK)4- CBDa- CBDb- CBDc- CBDd
4. Signal peptide- RGS(HIS)6- Xa factor- NaD1- linker (EAAAK)6- CBDa- CBDb- CBDc- CBDd
5. Signal peptide- RGS(HIS)6- Xa factor- CBDa- CBDb- CBDc- CBDd - NaD1
6. Signal peptide- RGS(HIS)6- Xa factor- CBDa- CBDb- CBDc- CBDd - linker (EAAAK)2- NaD1
7. Signal peptide- RGS(HIS)6- Xa factor- CBDa- CBDb- CBDc- CBDd - linker (EAAAK)4- NaD1
8. Signal peptide- RGS(HIS)6- Xa factor- CBDa- CBDb- CBDc- CBDd - linker (EAAAK)6- NaD1

**Figure S1.** Different modes of recombinant protein to check the appropriate length of the linker for the recombinant protein

Modes 1-4 are structures with different lengths of the EAAAK linker sequence in the mode where chitin-binding domains are in the C-terminal of the NaD1 peptide, Mode 5-8 structures with different lengths of the EAAAK linker sequence in the mode where chitin-binding domains are at the N-terminal of the NaD1 peptide.

| Proteins | Without Linker |          | Linker   |          |          |          |          |          |
|----------|----------------|----------|----------|----------|----------|----------|----------|----------|
|          |                |          | 2 Repeat |          | 4 Repeat |          | 6 Repeat |          |
|          | CBD-NaD1       | NaD1-CBD | CBD-NaD1 | NaD1-CBD | CBD-NaD1 | NaD1-CBD | CBD-NaD1 | NaD1-CBD |
| 4AML     | 0.95           | 0.92     | 0.92     | 0.99     | 0.98     | 0.95     | 0.99     | 0.96     |
| 1MR4     | 0.98           | 0.99     | 0.99     | 0.98     | 0.98     | 0.99     | 0.99     | 0.98     |

**Table S1.** Determining the length of EAAAK linker based on *Modeller* software

| Seq. ID.                  | Class | AMP Probability |
|---------------------------|-------|-----------------|
| NaD1-(CBD)4               | AMP   | 1.000           |
| (CBD) <sub>4</sub> - NaD1 | AMP   | 1.000           |
| NaD1                      | AMP   | 0.978           |

**Table S2.** The result of investigating the antimicrobial properties of the NaD1-(CBD)4, NaD1 -(CBD)4 and NaD1 cassettes by the Support Vector Machine (SVM) classifier algorithm

| Seq. ID.                  | Class | AMP Probability |
|---------------------------|-------|-----------------|
| NaD1-(CBD)4               | AMP   | 0.7875          |
| (CBD) <sub>4</sub> - NaD1 | AMP   | 0.799           |
| NaD1                      | AMP   | 0.8935          |

**Table S3.** The result of investigating the antimicrobial property of NaD1-(CBD)4, NaD1 -(CBD)4 and NaD1 cassettes by Random Forest Classifier algorithm

| Seq. ID.                  | Class |
|---------------------------|-------|
| NaD1-(CBD)4               | AMP   |
| (CBD) <sub>4</sub> - NaD1 | AMP   |
| NaD1                      | AMP   |

**Table S4.** the result of investigating the antimicrobial property of NaD1-(CBD)4, NaD1 -(CBD)4 and NaD1 cassettes by the Artificial Neural Network (ANN) classifier algorithm

| Seq. ID.                  | Class | AMP Probability |
|---------------------------|-------|-----------------|
| NaD1-(CBD)4               | AMP   | 1.000           |
| (CBD) <sub>4</sub> - NaD1 | AMP   | 1.000           |
| NaD1                      | AMP   | 0.974           |

**Table S5.** The result of investigating the antimicrobial property of NaD1-(CBD)4, NaD1 -(CBD)4 and NaD1 cassettes by the Discriminant Analysis classifier algorithm

| Step                 | Temperature (C°) | Time   | Cycles |
|----------------------|------------------|--------|--------|
| Initial denaturation | 95               | 5 min  |        |
| Denaturation         | 95               | 45 Sec | 35     |
| Annealing            | Table 1          | 30 Sec |        |
| Extension            | 72               | 30 Sec |        |

**Table S6.** PCR, colony PCR and RT-PCR reaction program for all genes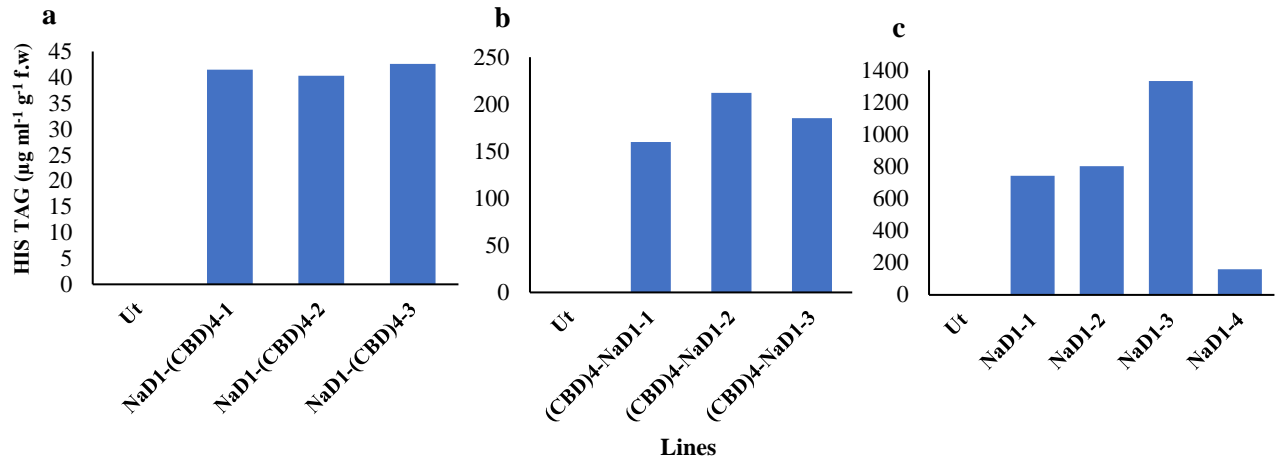**Figure S2.** Production of the recombinant protein containing Histidine tag sequence, (His)<sub>6</sub> by ELISA test.

The recombinant peptides were identified using a His-Tag Protein ELISA kit (AKR-130 of Cell Biolabs, Inc.). Transgenic HRs (a) expressed (His)<sub>6</sub>-NaD1-(CBD)<sub>4</sub>; (b) expressed (His)<sub>6</sub>- (CBD)<sub>4</sub>- NaD1, (c) Transgenic HRs expressed (His)<sub>6</sub>-NaD1 peptide. Ut: represents non-transgenic HRs.

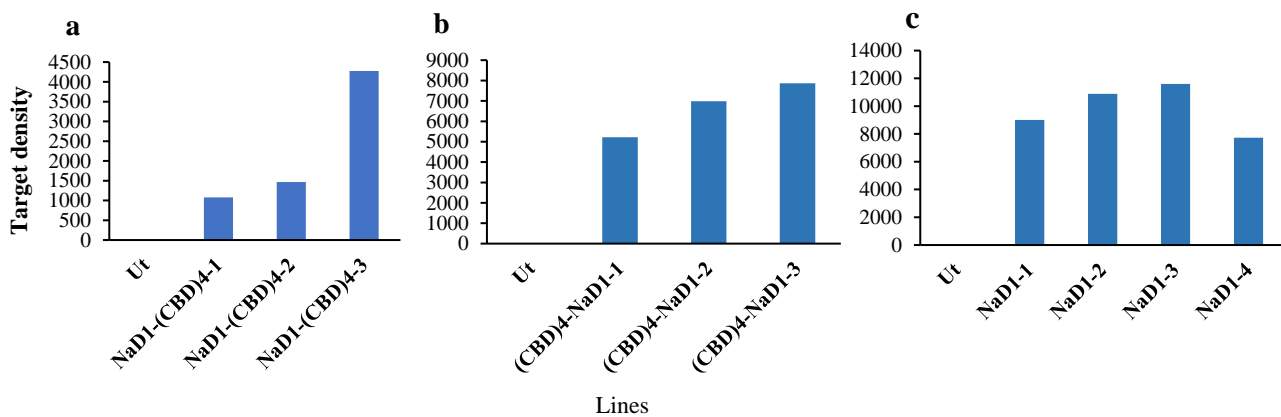**Figure S3.** Quantification of immunoblots using the image j 1.62 software.

The recombinant peptides were identified by utilizing the Anti-His monoclonal antibody sc-8036 (Santa Cruz Biotech). Transgenic HRs (a) expressed (His)<sub>6</sub>-NaD1-(CBD)<sub>4</sub>; (b) expressed (His)<sub>6</sub>- (CBD)<sub>4</sub>- NaD1, (c) Transgenic HRs expressed (His)<sub>6</sub>-NaD1 peptide. Ut: represents non-transgenic HRs.

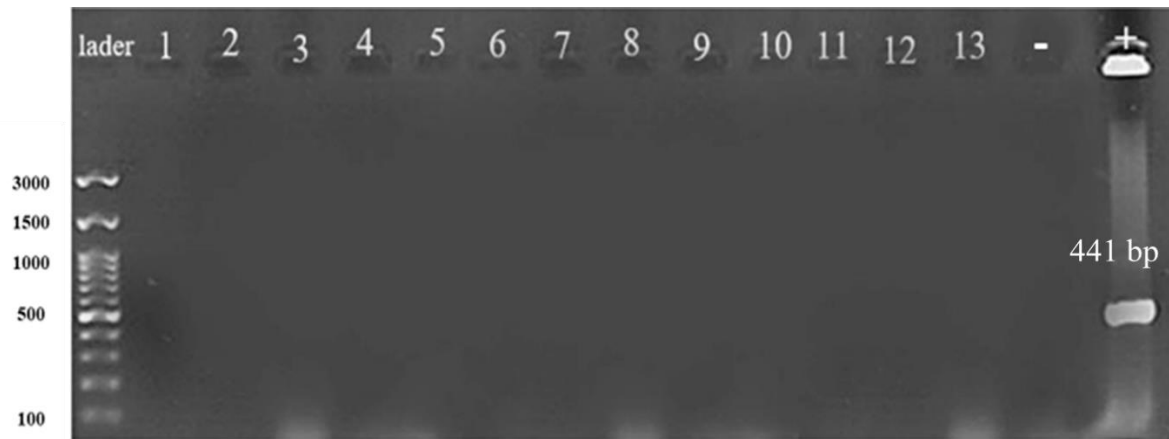

**Figure S4.** Assessment of bacterial contamination by checking *Vir D1* gene from *Agrobacterium rhizogenes*.

Samples 1 to 4 correspond to transgenic HRs with the *NaD1*-*(CBD)<sub>4</sub>* cassette, samples 5 to 8 to those with the *(CBD)<sub>4</sub>*-*NaD1* cassette, and samples 9 to 12 to those with the *NaD1* cassette. Sample 13 is the control HR, which lacks the gene fragment. The image also displays the negative control and the amplification band of *Vir D1* at 441 bp, serving as the positive control (*Agrobacterium rhizogenes* PCR). Ladder is 100 bp.

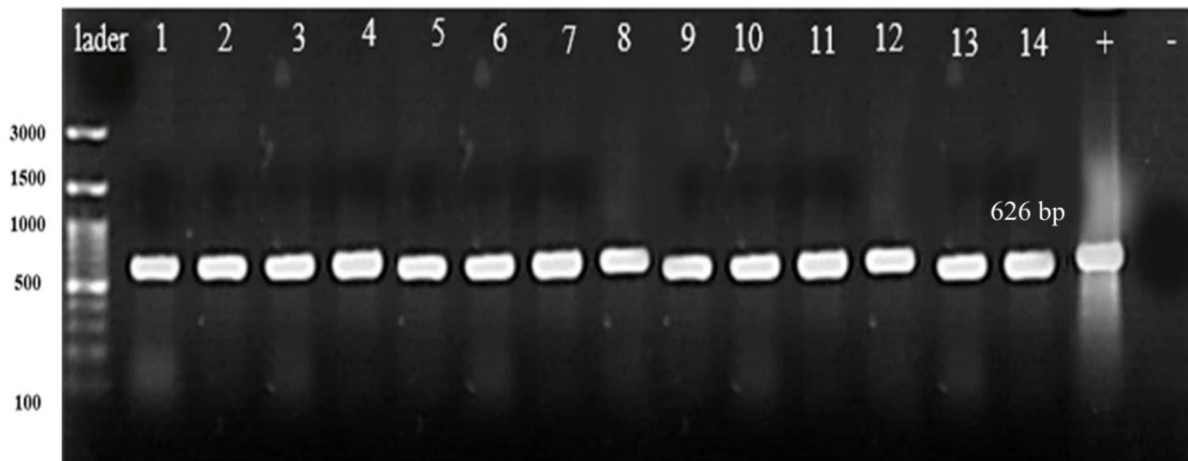

**Figure S5.** Amplifying of *rol C* gene to confirm the formation of HRs.

Amplifying a 626 bp PCR product of HRs with specific *rol C* gene primers on the 1% agarose gel. Numbers 1 to 5 belong to transgenic HRs containing the *NaD1*-*(CBD)<sub>4</sub>* cassette, numbers 6 to 9 belong to transgenic HRs containing *NaD1*-*(CBD)<sub>4</sub>* cassette, numbers 10 to 13 belong to transgenic HRs containing *NaD1* cassette, number 14 belong to the control HR (lacking the gene fragment). The end of the negative control image and the *rol C* gene bp fragment 626 amplification band are shown as positive control (*Agrobacterium rhizogenes* PCR). The ladder is 100 bp.

| S.O.V                            | DF   | Ms      |          |         |          |
|----------------------------------|------|---------|----------|---------|----------|
|                                  |      | 2nd day | 5th day  | 7th day | 10th day |
| Protein extracts                 | 3    | 485.9** | 1620.8** | 755.4** | 1131.2** |
| Concentrations                   | 2    | 817.3** | 8.8 n.s  | 681.5** | 470.1**  |
| Protein extracts *Concentrations | 6    | 6.3 n.s | 27.3**   | 9.2 n.s | 34.6**   |
| Erorr                            | 24   | 8.3     | 3.1      | 9.4     | 8.11     |
| Total                            | 35   |         |          |         |          |
| CV                               | 9.61 |         |          |         |          |

**Table S7.** Variance analysis of growth inhibition rate of mycelium (*Pyricularia oryzae*) growing on the PDA medium containing concentrations of 20, 50, and 100 µg/ ml NaD1-(CBD)<sub>4</sub>, (CBD)<sub>4</sub>-NaD1 and NaD1 and protein extract after 2, 5, 7, and 10 days of culture

. \*Significant  $\alpha=0.05$       \*\* Significant  $\alpha=0.01$       n.s: Non- Significant

| S.O.V                  | DF   | Mean squares |
|------------------------|------|--------------|
|                        |      |              |
| Protein extracts       | 4    | 606.116**    |
| Time                   | 2    | 450.986**    |
| Protein extracts* Time | 8    | 79.129**     |
| Erorr                  | 30   | 0.068**      |
| Total                  | 44   |              |
| CV                     | 3.23 |              |

**Table S8.** Statistical analysis of antifungal activity of the HR protein extracts, by using the disc diffusion approach against *Pyricularia oryzae*.

\*Significant  $\alpha=0.05$       \*\* Significant  $\alpha=0.01$       n.s: Non- Significant

| S.O.V                   | DF    | Mean squares |
|-------------------------|-------|--------------|
|                         |       |              |
| Protein treatment       | 4     | 7030**       |
| Time                    | 2     | 2802.222**   |
| Protein treatment* Time | 8     | 471.66667**  |
| Error                   | 30    | 66.66667     |
| Corrected Total         | 44    |              |
| CV                      | 11.62 |              |

**Table S9.** Variance analysis of the survival percentage of third instar larvae of *Chilo suppressalis* feeding by the recombinant protein extracts after 72 hours.

\*Significant  $\alpha=0.05$       \*\* Significant  $\alpha=0.01$       n.s: Non- Significant

| S.O.V             | Mean squares |            |         |         |            |         |         |
|-------------------|--------------|------------|---------|---------|------------|---------|---------|
|                   | DF           | CAT        | POD     | APX     | SOD        | TRY     | CTR     |
| Protein treatment | 4            | 0.000011** | 112.2** | 0.811** | 0.000016** | 47.88** | 28.77** |
| Error             | 10           | 0.0000006  | 0.017   | 1.72    | 0.00000016 | 1.43    | 0.64    |
| Total             | 14           |            |         |         |            |         |         |
| CV                |              | 17.73      | 14.39   | 18.6    | 8.30       | 12.19   | 9.88    |

**Table S10** Variance analysis of the activities of CAT, POD, APX, SOD, TRY and CTR enzymes in the third instar larvae of *Chilo suppressalis* feeding by the recombinant protein extracts from tobacco HRs after 72 hours.

\*Significant  $\alpha=0.05$  \*\* Significant  $\alpha=0.01$  n.s: Non- Significant
